# Supplementary material
Source: PubMed Central journal article supplement (PMC9884487)
Supplement: NIHMS1862509-supplement-Supplemental_Figures.pdf [file NIHMS1862509-supplement-Supplemental_Figures.pdf]

## Supplementary Appendix

Supplement to: Cowan MJ, Yu J, Facchino J, et al. Lentiviral gene therapy for artemis-deficient SCID. *N Engl J Med* 2022;387:2344-55. DOI: 10.1056/NEJMoa2206575

This appendix has been provided by the authors to give readers additional information about the work.

**Contents**

**Page**

|                                                                                                                                           |    |
|-------------------------------------------------------------------------------------------------------------------------------------------|----|
| Supplementary Methods                                                                                                                     | 2  |
| Figure S1: Immune reconstitution in peripheral blood following initial and second infusions of transduced cells in patient ART010.        | 3  |
| Figure S2: Hemoglobin, Platelet and Absolute Neutrophil Counts in peripheral blood.                                                       | 4  |
| Figure S3: Development of T Cell Receptor Excision Circles (TRECs) and naïve T cells post infusion of AProArt-transduced CD34+ cells.     | 5  |
| Figure S4: Lymphocyte proliferative response to phytohemagglutinin (PHA) following infusion of autologous AProArt-transduced CD34+ cells. | 6  |
| Figure S5: T cell receptor V $\beta$ diversity at baseline and following infusion of autologous gene corrected CD34+ cells.               | 7  |
| Figure S6: Sequential stages of B cell maturation following infusion of AProArt transduced CD34+ cells.                                   | 9  |
| Figure S7: Vector integration site analysis.                                                                                              | 10 |
| Table S1: Genotypes and pathogenicity of DCLRE1C variants                                                                                 | 12 |
| Table S2: Representativeness of Study Participants.                                                                                       | 13 |
| Table S3: Serious Adverse Events.                                                                                                         | 14 |
| Table S4: Adverse Events considered to be possibly, probably, or definitely related to the study treatment.                               | 15 |
| Supplementary References                                                                                                                  | 16 |

## Supplementary Methods

### T CELL RECEPTOR (TCR) $\beta$ CHAIN DIVERSITY AND VECTOR INSERTION SITE ANALYSIS

Diversity of the TCR $\beta$  repertoire was analyzed by deep sequencing of mRNA encoding the *TCRB* locus as described.<sup>1,2</sup> Sequences identified by LymAnalyzer<sup>3</sup> were used to determine unique sequence frequency and metrics of clonotype diversity.

Vector insertion sites (VIS) were identified in sorted cell lineages by ligation-mediated PCR<sup>4,5</sup> (Lenti-X Integration Site Analysis Kit, Takara Bio, Mountain View, CA), digesting the genomic DNA with restriction enzymes TaqI and HpyCH4IV. Adaptors were ligated to the fragments, and a first PCR was performed with biotinylated primers, followed by capture with Streptavidin beads. Two rounds of nested PCR with customized, bar-coded primers allowed generation of libraries that were sequenced (Illumina, 250 bp paired end reads) and mapped to human genome Release 39.<sup>6-9</sup>

### METRICS OF TCR $\beta$ DIVERSITY

Metrics of TCR $\beta$  diversity included the Shannon information index [H], which measures the diversity of the sample on a logarithmic scale, including both the number of variants and their frequency distribution. Two indices were derived from [H]: information density,  $ID=[H]/\ln(\text{number of mapped sequence reads})$ , measuring how close the sample consists entirely of unique reads; and equitability index,  $E_H=[H]/\ln(\text{number of clonotypes})$ , measuring how close the sample consists of equal numbers of reads for each clonotype. See Figure S5 legend for details of the calculations. Normal ranges for  $E_H$  and ID were derived from cumulative Beta distributions with parameters matching the mean and variance of a convenience sample of seven healthy adults.<sup>10</sup>

Figure S1: Immune reconstitution in peripheral blood following initial and second infusions of transduced cells in patient ART010.

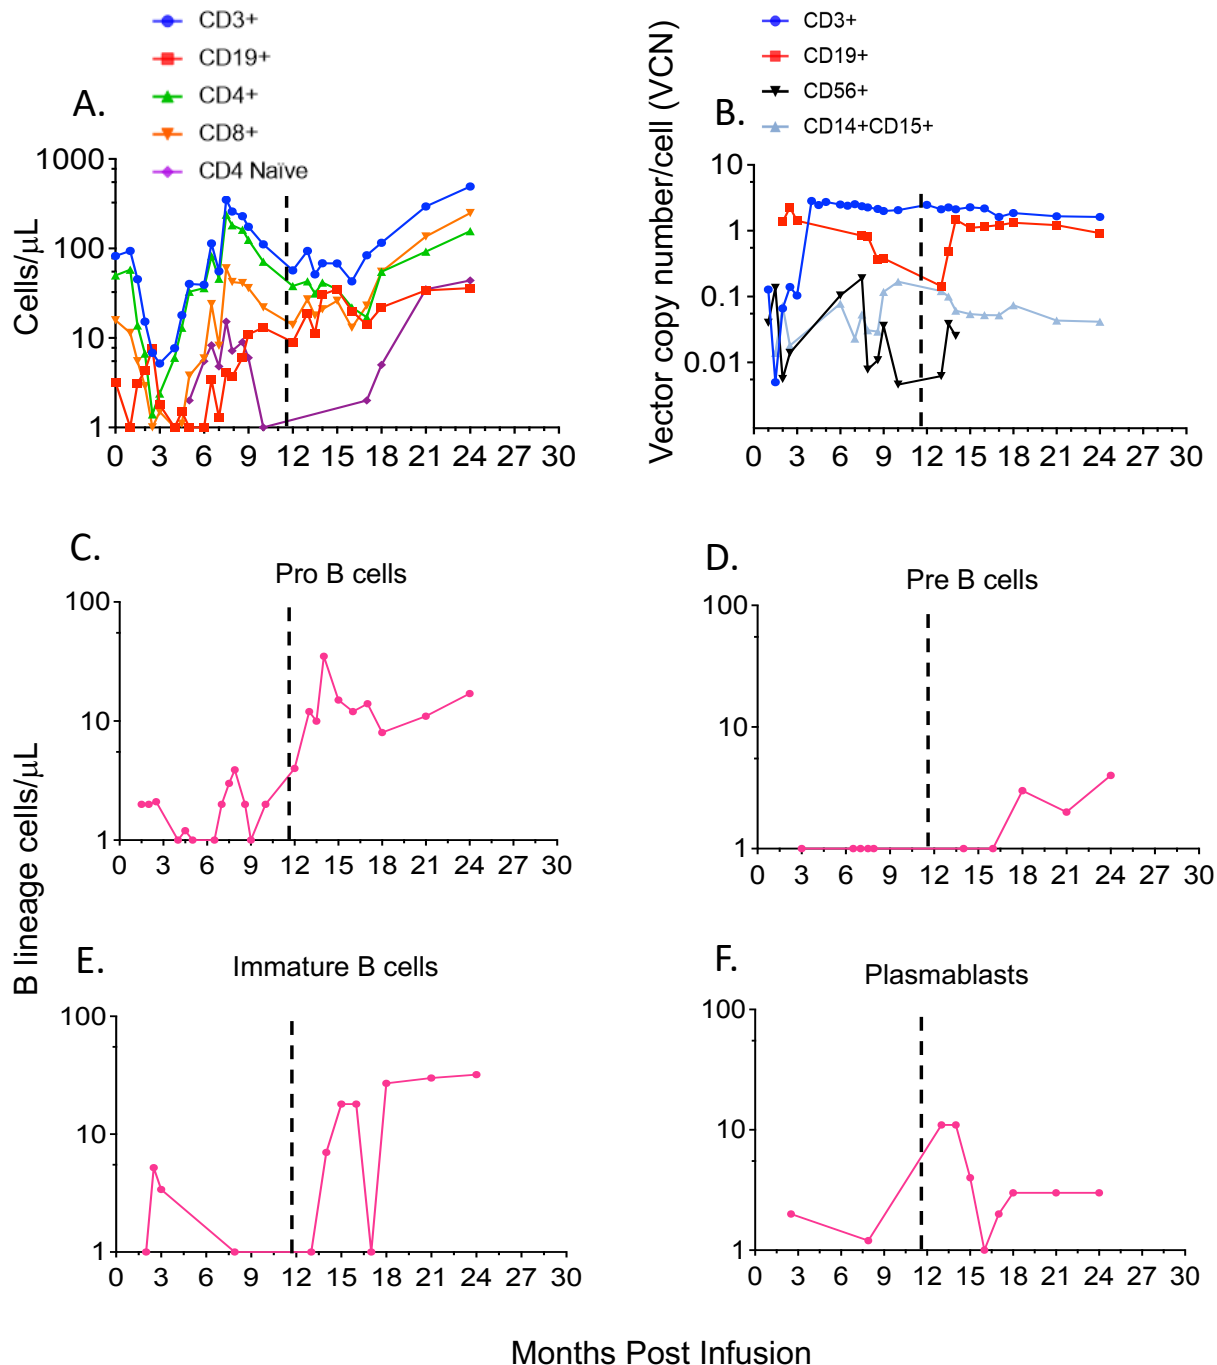

**Supplementary Figure S1. Immune reconstitution in peripheral blood following initial and second infusions of transduced cells in patient ART010.** A, Numbers of lymphocytes in each subset: CD3<sup>+</sup> total T cells, CD19<sup>+</sup> B cells, CD4<sup>+</sup> T helper cells, CD8<sup>+</sup> T cytotoxic cells, CD4<sup>+</sup>/CD45RA<sup>+</sup> naïve T cells. B, Gene marking in the indicated cell subsets. C-F, B lineage cells at sequential stages of maturation. Dashed line represents time of second treatment with busulfan and gene transduced autologous cells. By 12 months after second cell infusion, proliferation to PHA had normalized, cytomegalovirus became undetectable, IgM was present at 17 mg/dL, and isohemagglutinins were positive at 1:4 dilution.

Figure S2: Hemoglobin, Platelet and Absolute Neutrophil Counts in peripheral blood.

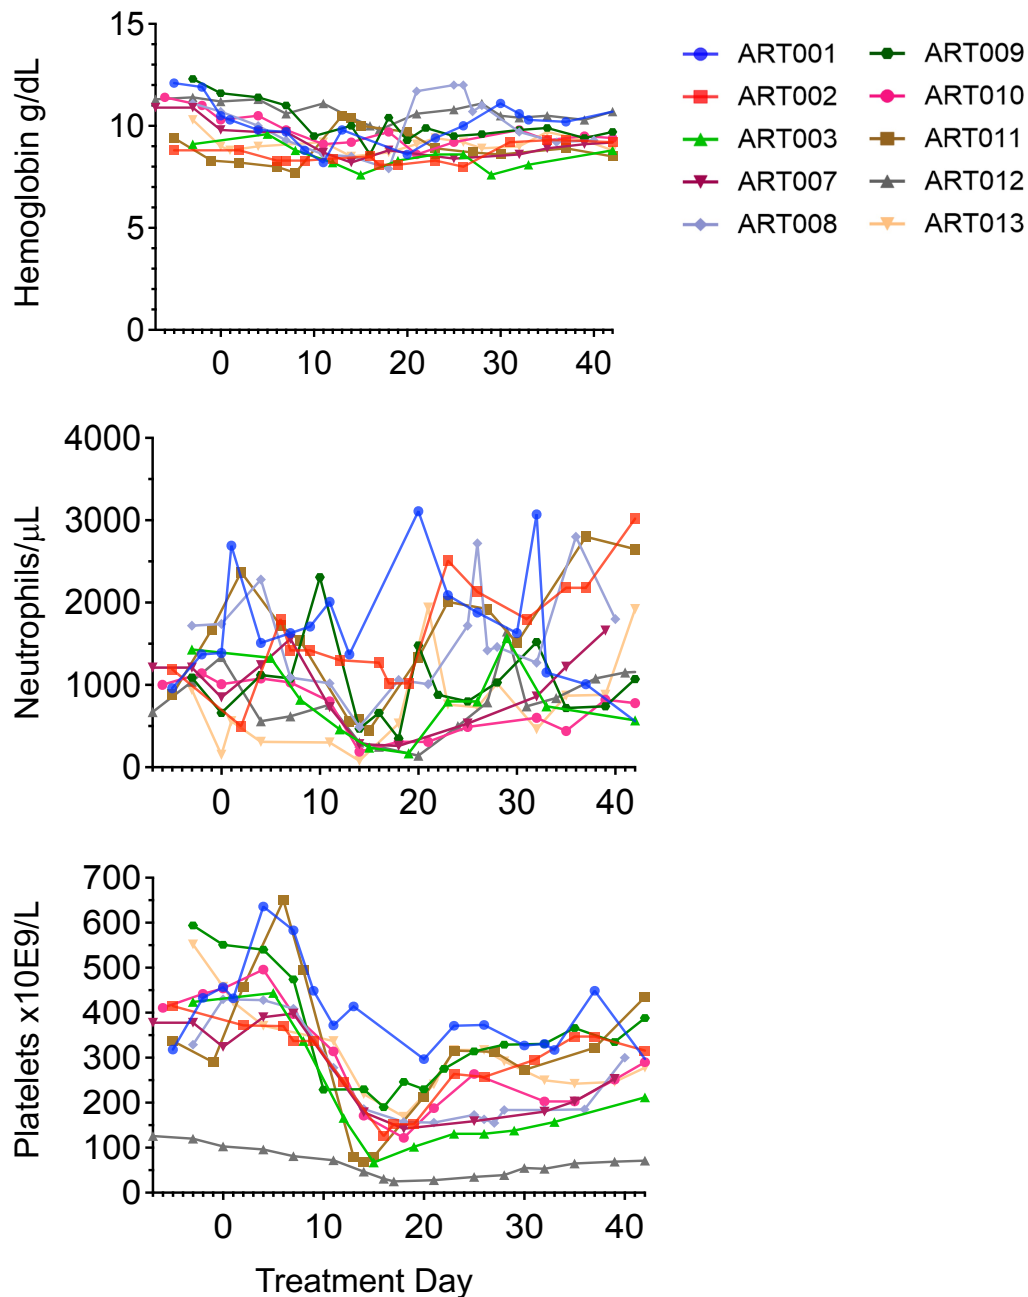

**Supplementary Figure S2. Hemoglobin, Platelet and Absolute Neutrophil Counts in peripheral blood.** Busulfan was given on days -1 and -2, with gene corrected CD34<sup>+</sup> cells infused on day 0. Reference Ranges: Hemoglobin: 9.5-13.5 g/dL; Platelets: 140-450 $\times 10^9/\text{L}$ ; Neutrophils: 500-10000/ $\mu\text{L}$ .

Figure S3: Development of T Cell Receptor Excision Circles (TRECs) and naïve T cells post infusion of AProArt-transduced CD34<sup>+</sup> cells.

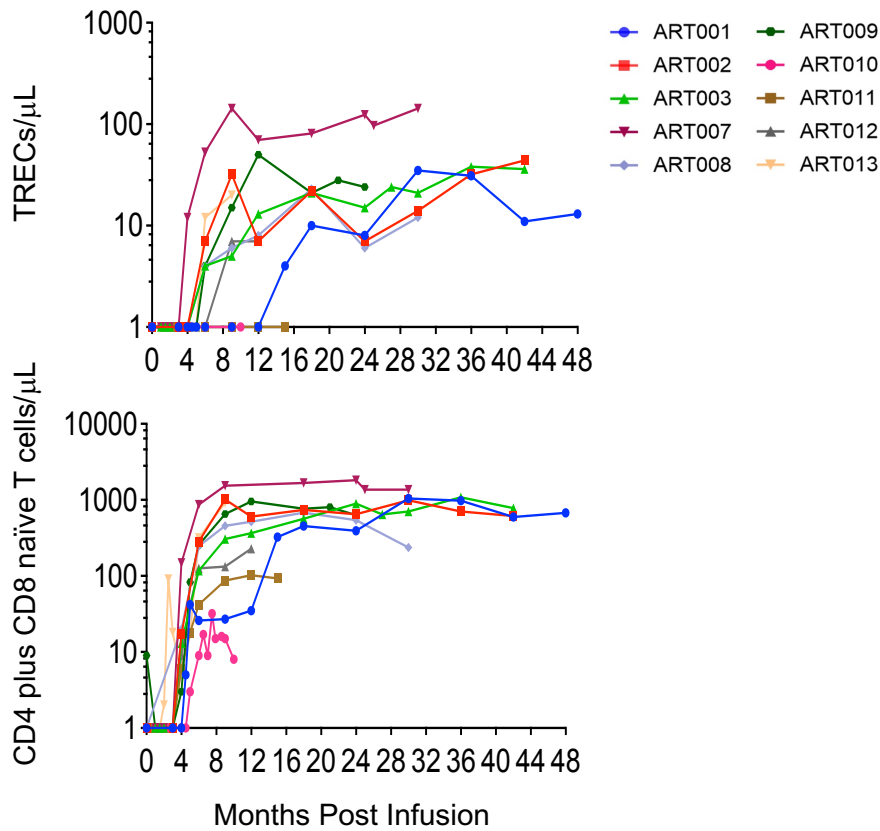

**Supplementary Figure S3. Development of T Cell Receptor Excision Circles (TRECS) and naïve T cells post infusion of AProArt-transduced CD34<sup>+</sup> cells.** Upper graph, TRECs; lower graph, naïve T cells (CD4 plus CD8 T cells that also express CD45RA and CCR7).

Figure S4: Lymphocyte proliferative response to phytohemagglutinin (PHA) following infusion of autologous AProArt-transduced CD34<sup>+</sup> cells.

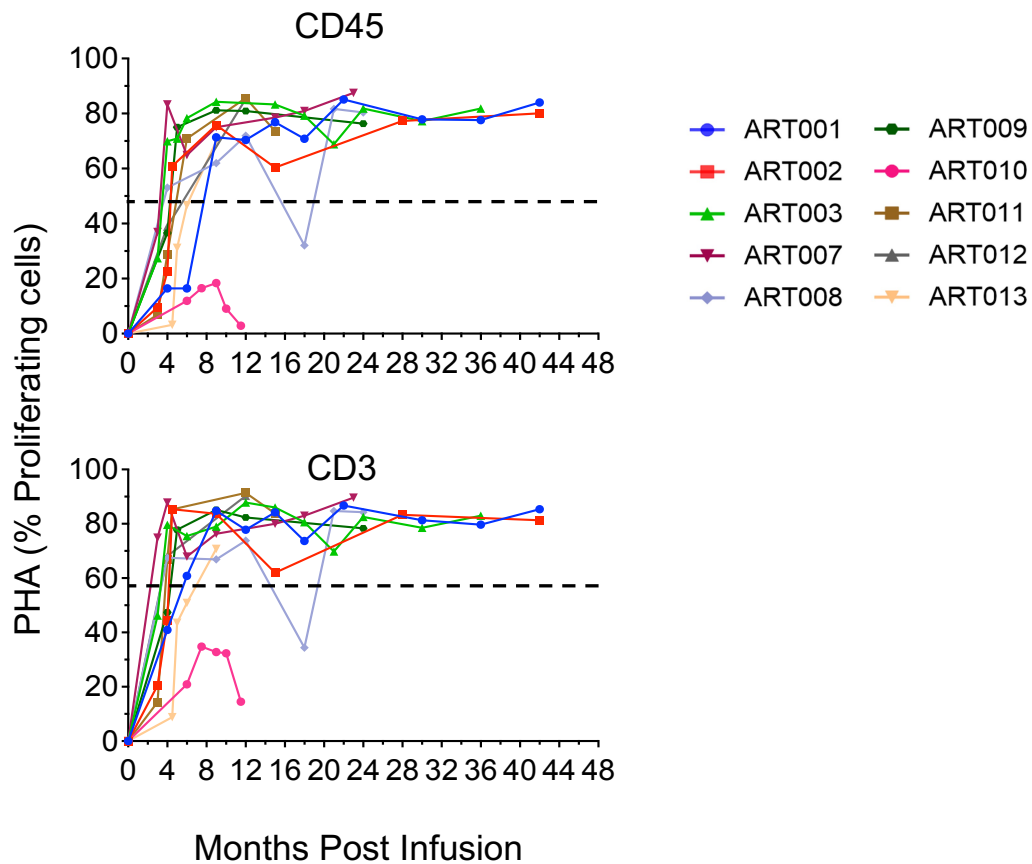

**Supplementary Figure S4. Lymphocyte proliferative response to phytohemagglutinin (PHA) following infusion of autologous AProArt-transduced CD34<sup>+</sup> cells.** Top, CD45<sup>+</sup> total lymphocytes; bottom, CD3<sup>+</sup> T lymphocytes. - - -, Lower limit of control reference range: CD45: 49.9%, CD3: 58.5%.

Figure S5: T cell receptor V $\beta$  diversity at baseline and following infusion of autologous gene corrected CD34<sup>+</sup> cells.

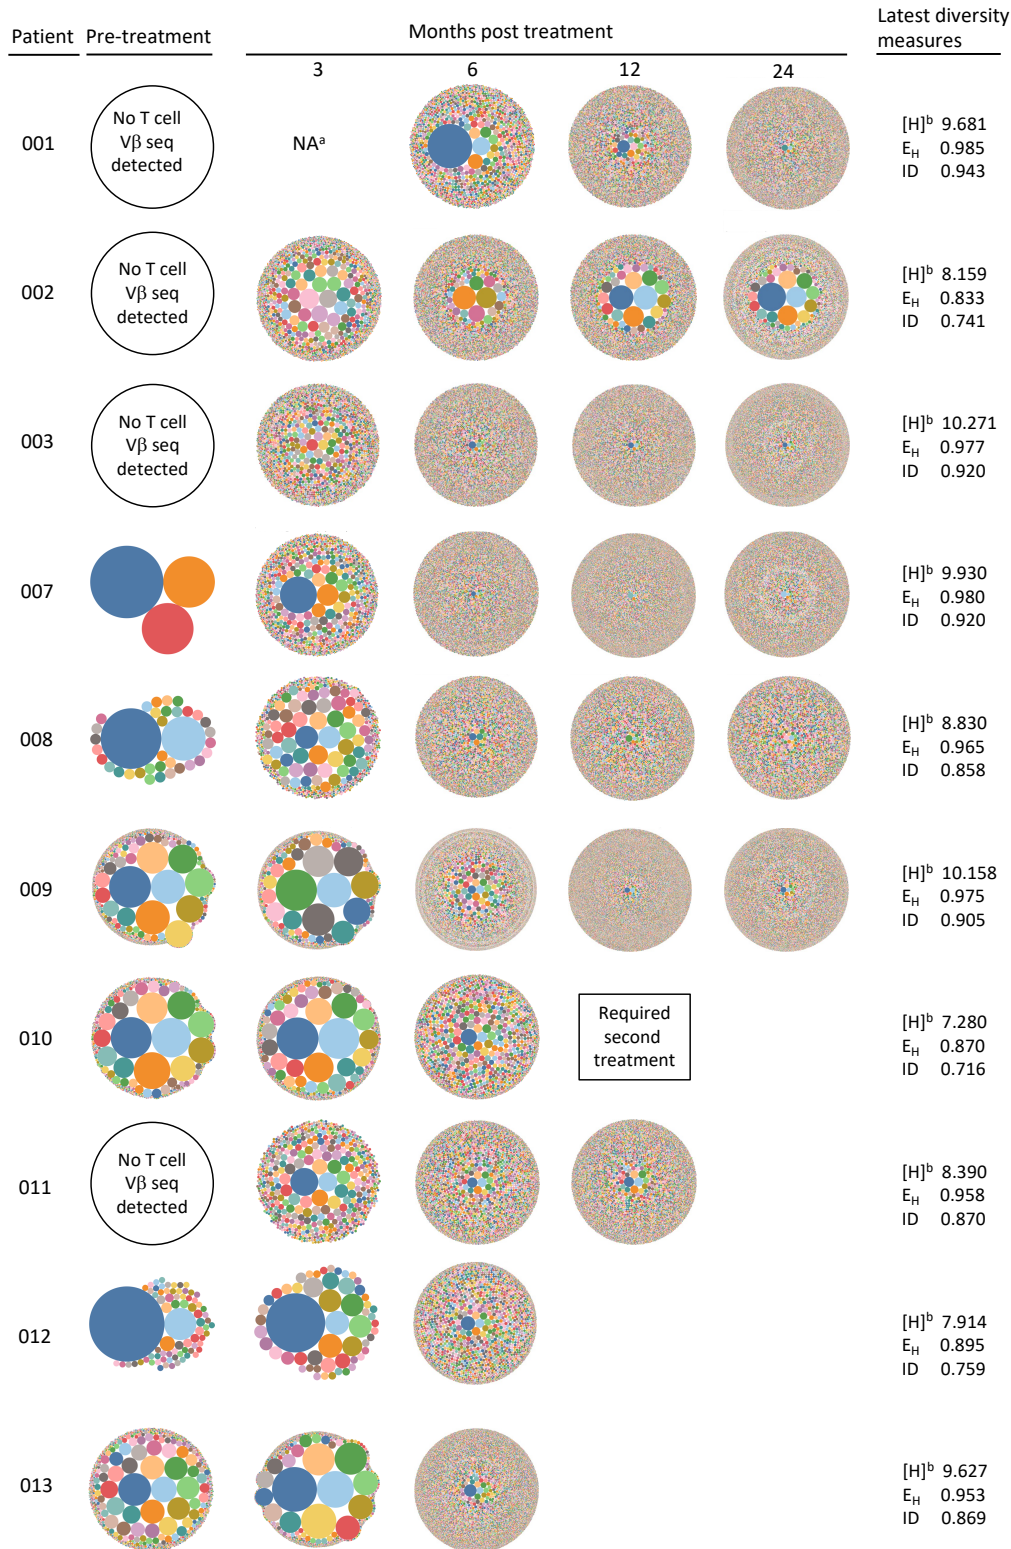



**Figure S5. T cell receptor V $\beta$  diversity at baseline and following infusion of autologous gene corrected CD34<sup>+</sup> cells.** Diversity was assessed by deep sequencing, using the method of Zvyagin et al,<sup>1</sup> modified as in Delmonte et al.<sup>2</sup> Briefly, total blood RNA was reverse transcribed with unique molecular identifiers incorporated into the reverse transcription reaction. After size selection and library synthesis, at least 50,000 sequence reads were obtained from each sample. After excluding duplicate reads, unique sequences aligned to complementarity-determining regions of the human TCRB locus using LymAnalyzer software were visualized by hierarchical tree maps. The Shannon information index [H], equitability index  $E_H$  and information density (ID) were calculated, along with their variances, according to Basharin.<sup>10</sup> We chose to use the equitability index because it is scale independent and measures evenness of the distribution without using the distribution of pairs of variants, as does the alternative Simpson[1-D] index. The Shannon [H] index of information, or entropy, gives the information content of the variants in the sample, but it is dependent on the sample size. Normalizing by dividing by the logarithm of the number of reads gives the information density (ID), which is independent of the number of reads.

Thus, [H] with SD was calculated as: 
$$H = - \sum_{i=1}^K p_i \ln p_i$$

where N is number of unique reads and p the proportion (n/N) with a particular clonotype sequence in K clonotypes sampled. Equitability index was calculated as:  $E_H = H / \ln K$ .

Information density was calculated as:  $ID = H / \ln N$ .

Illustrations and diversity measures are shown for the most recent time point sampled. Initial evaluations at baseline showed no detectable TCR V $\beta$  sequences for patients ART001, ART002, ART003, and ART011, who also had no detectable T cells by flow cytometry and no maternal engraftment. The remaining patients presented with detectable maternal T cells, which could have contributed to the oligoclonal TCR V $\beta$  sequences observed at baseline.

For comparison, diversity metrics and variances of blood samples from 7 healthy adults were obtained, showing mean [H]  $9.706 \pm$  SD 0.491, calculated as follows:

$$Var[H] = \frac{1}{N} \left[ \sum_{i=1}^K p_i (\ln p_i)^2 - H^2 \right] \quad SD [H] = \sqrt{Var[H]}$$

The mean  $E_H$  for the 7 adult samples was 0.935, with 95% confidence interval (CI) 0.840-0.989, derived from fitting to the cumulative Beta distribution (35.65,2.46). The mean ID for the 7 adult samples was 0.882, with 95% CI 0.742-0.972, derived from fitting to Beta(25.05,3.36).

Footnotes: a, no sample available; b, Shannon [H] index, equitability index ( $E_H$ ) and information density (ID), respectively, at 24 months post treatment or most recent analysis; diversity stabilized by 12 months and has not changed for patients followed longer (not shown).

Figure S6: Sequential stages of B cell maturation following infusion of AProArt transduced CD34<sup>+</sup> cells.

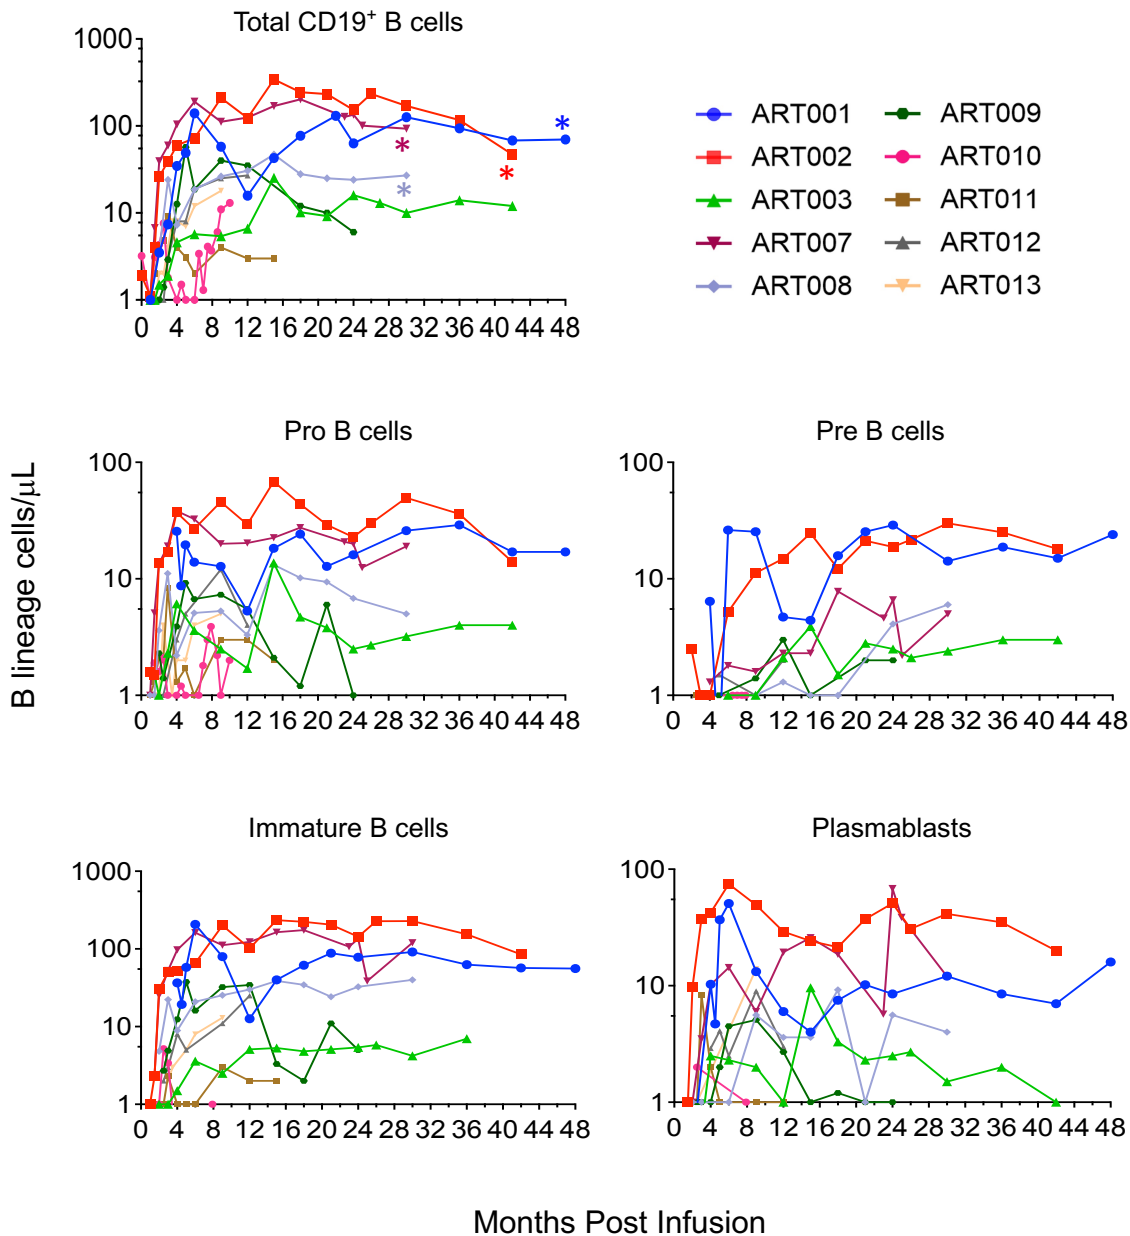

**Supplementary Figure S6. Sequential stages of B cell maturation following infusion of AProArt transduced CD34<sup>+</sup> cells.** Total CD19<sup>+</sup> B cells, top graph, with \* indicating patients no longer requiring IgG infusions. B lineage cell subsets in peripheral blood were identified by the following cell surface marker combinations: Pro B cells, CD19<sup>+</sup>, CD43<sup>+</sup>; Pre B cells, CD19<sup>+</sup>, CD43<sup>-</sup>, IgM<sup>-</sup>; Immature B cells, CD19<sup>+</sup>, CD43<sup>-</sup>, IgM<sup>+</sup>; Plasmablasts, CD19<sup>+</sup>, CD27<sup>+</sup>, CD38<sup>+</sup>.

Figure S7: Vector integration site analysis.

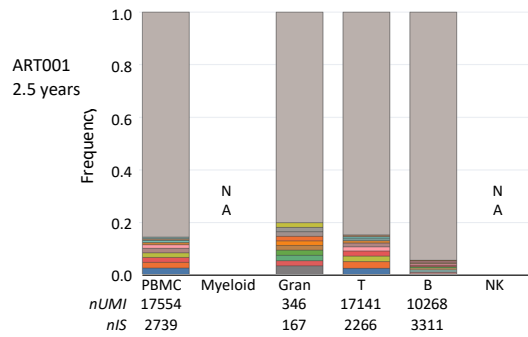

| Gene       | Frequency |
|------------|-----------|
| WBP1L      | 0.026     |
| NF1        | 0.022     |
| RERE       | 0.021     |
| ABCA3      | 0.020     |
| RNF213-AS1 | 0.016     |
| RNF213     | 0.016     |
| SNX8       | 0.013     |
| C15        | 0.009     |
| PLVAP      | 0.007     |
| SKAP1      | 0.007     |

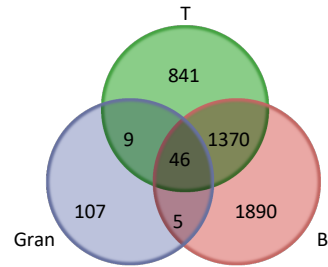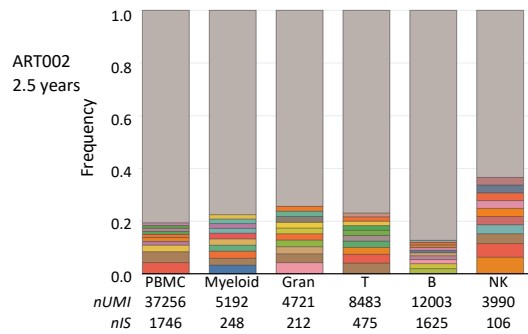

| Gene          | Frequency |
|---------------|-----------|
| SETD1B        | 0.045     |
| KLHL3         | 0.027     |
| RP11-383A19.1 | 0.016     |
| MAD1L1        | 0.016     |
| MARK3         | 0.015     |
| IL21R         | 0.014     |
| CEP85         | 0.013     |
| PHF20         | 0.012     |
| ZFAND3        | 0.012     |
| TAX1BP1       | 0.011     |

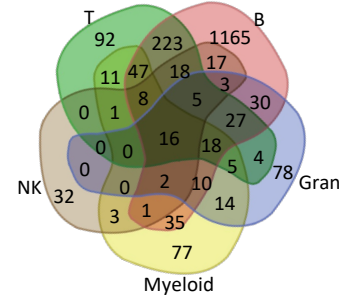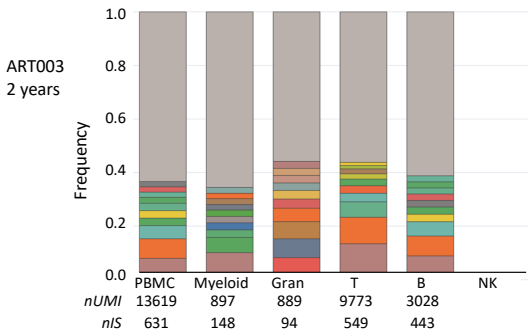

| Gene              | Frequency |
|-------------------|-----------|
| PIPSK1C           | 0.078     |
| NF1               | 0.071     |
| INTS11            | 0.049     |
| EYA3              | 0.027     |
| CDC5L             | 0.027     |
| GATAD2B           | 0.026     |
| RPS6KA1           | 0.022     |
| SBNO2             | 0.020     |
| MALAT1            | 0.019     |
| ENSG10010138868.1 | 0.019     |

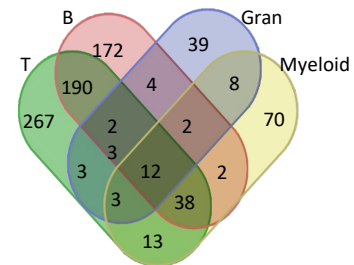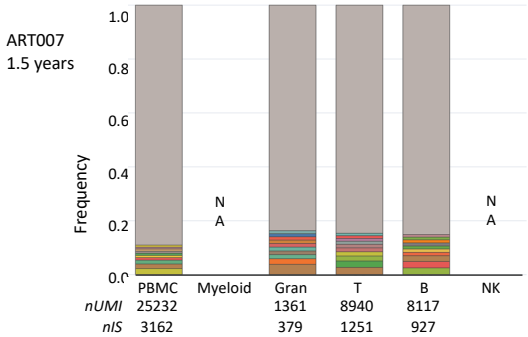

| Gene     | Frequency |
|----------|-----------|
| SLX4IP   | 0.022     |
| C2CD3    | 0.016     |
| PGS1     | 0.014     |
| NF1      | 0.011     |
| RAB40C   | 0.009     |
| KDM2A    | 0.009     |
| ARHGAP35 | 0.008     |
| FYTTD1   | 0.008     |
| FBXL20   | 0.008     |
| UQCR11   | 0.008     |

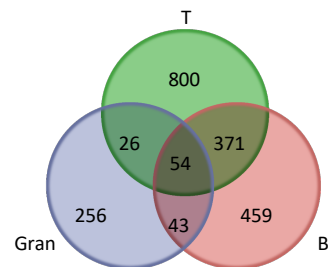

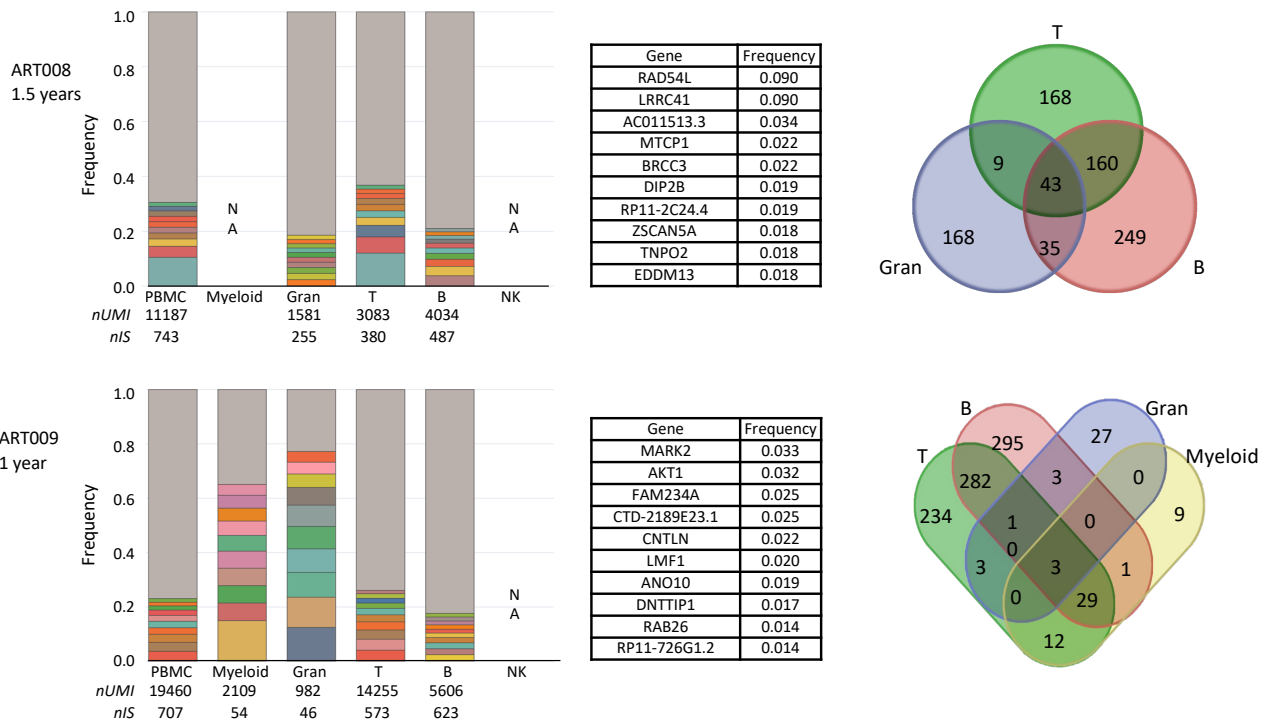

**Supplementary Figure 7. Vector integration site analysis.** Isolated cell lineages of sufficient quantity from peripheral blood of the first 6 patients treated were subjected to vector integration site mapping. Years post infusion of transduced CD34<sup>+</sup> cells are shown. Bar graphs, left: proportion of the 10 most frequent mapped vector-genomic DNA junction sequences in individual colors, with pooled less frequent integration sites in grey. Tables, center: the 10 most frequent genetic loci of vector integration for each patient. Venn diagrams, right: integration sites detected in multiple peripheral blood lineages, with numbers indicating instances of integration sites in common.

PBMC, peripheral blood mononuclear cells; Gran, granulocytes; NA, not available due to insufficient quantity of DNA; *nUMI*, number of unique molecular identifier sequences that contained genomic-AProART provirus junctions; *nIS*, number of distinct vector integration sites detected in the sample.

**Table S1. Genotypes and pathogenicity of DCLRE1C variants found in patients in this study.**

| Patient(s)  | Mutation type  | cDNA                  | Protein                       | ClinVar accession number | Level of pathogenicity (ACMG Criteria) <sup>1</sup> |
|-------------|----------------|-----------------------|-------------------------------|--------------------------|-----------------------------------------------------|
| 1, 8, 9, 13 | Nonsense       | c.597C>A              | Tyr199X                       | VCV000004673.10          | Pathogenic                                          |
| 10          | Missense       | c.47T>C               | p.Ile16Thr                    | VCV001069380.2           | Pathogenic                                          |
| 12          | Missense       | c.346T>C              | p.Cys116Arg                   | SCV002589114             | Pathogenic <sup>3</sup>                             |
| 7           | Missense       | c.406G>A              | Asp136Asn                     | SCV002598533             | Pathogenic                                          |
| 3           | Complex        | c.492_504 delins13    | p.Thr167_Phe168 delins>MetLeu | VCV000649045.1           | Pathogenic <sup>3</sup>                             |
| 12          | Splice         | c.161+2T>G            | splice                        | SCV002598533             | Pathogenic <sup>2</sup>                             |
| 11          | Gross deletion | Del exon 3            |                               | VCV001455217.3           | Likely Pathogenic                                   |
| 3, 10, 11   | Gross deletion | Del exons 1-3         |                               | VCV000583822             | Likely Pathogenic                                   |
| 2           | Gross deletion | Del exons 1-4 (82 kb) |                               | VCV000004666.1           | Likely Pathogenic                                   |
| 7           | Gross deletion | Del exons 1-5         |                               | SCV002589115             | Likely Pathogenic                                   |

<sup>1</sup>Determination according to Richards, S, Nazneen A, Bale S, et al. Standards and guidelines for the interpretation of sequence variants: a joint consensus recommendation of the American College of Medical Genetics and Genomics and the Association for Molecular Pathology. Genet Med. 2015;17(5):405-424.

<sup>2</sup>Pathogenicity score includes widely accepted functional studies (radiation sensitivity, correction of defect in patient fibroblasts upon addition of normal human cDNA) (M. Cowan and J. Puck, unpublished data).

**Table S2. Representativeness of Study Participants**

| Category                                 |                                                                                                                                                                                                                                                                                                                                                          |
|------------------------------------------|----------------------------------------------------------------------------------------------------------------------------------------------------------------------------------------------------------------------------------------------------------------------------------------------------------------------------------------------------------|
| Disease                                  | Artemis-deficient severe combined immunodeficiency                                                                                                                                                                                                                                                                                                       |
| Special considerations related to        |                                                                                                                                                                                                                                                                                                                                                          |
| Sex and gender                           | Autosomal recessive with males and females being equally affected                                                                                                                                                                                                                                                                                        |
| Age                                      | Diagnosed by newborn screening (NBS); without NBS patients generally present in the 1 <sup>st</sup> 6 months of life <sup>11,12</sup>                                                                                                                                                                                                                    |
| Race or ethnic group                     | In the U.S. there is a high prevalence of ART-SCID among Navajo and Apache Native Americans <sup>13,14</sup>                                                                                                                                                                                                                                             |
| Geography                                | There is a high prevalence in Middle Eastern countries including Saudi Arabia and Israel (Gaza)                                                                                                                                                                                                                                                          |
| Overall representativeness of this trial | Given the small sample size one cannot accurately assess this factor. However, the increased number of Navajo/Apache Native American patients enrolled (40%) is consistent with their increased prevalence of this disease due to a founder mutation. Overall SCID incidence in the U.S. is based on data from universal newborn screening <sup>13</sup> |

**Table S3. Serious Adverse Events**

| Patient ID | SAE (month post infusion) <sup>1</sup>                             | SAE diagnosis <sup>2</sup>                | Grade <sup>3</sup> | SAE category                    | Relationship to study treatment | Unexpected <sup>4</sup> |
|------------|--------------------------------------------------------------------|-------------------------------------------|--------------------|---------------------------------|---------------------------------|-------------------------|
| ART002     | -1.2                                                               | Processing incident <sup>5</sup>          | N/A                | N/A                             | None                            | Yes                     |
| ART001     | 4.8                                                                | AIHA                                      | 3                  | Hospitalization                 | Probable                        | No                      |
| ART001     | 6.6                                                                | Vomiting                                  | 2                  | Hospitalization                 | None                            | No                      |
| ART002     | 5.5                                                                | Infection: cytomegalovirus                | 3                  | Hospitalization                 | None                            | No                      |
| ART002     | 6.5                                                                | Rotavirus enteritis                       | 3                  | Hospitalization                 | None                            | No                      |
| ART001     | 11.7                                                               | Dehydration                               | 3                  | Hospitalization                 | None                            | No                      |
| ART001     | 14.7                                                               | Infection: <i>C. Difficile</i>            | 3                  | Hospitalization                 | None                            | No                      |
| ART001     | 16.2                                                               | Infection: Norovirus                      | 3                  | Hospitalization                 | None                            | No                      |
| ART001     | 22.8                                                               | Infection: Bacteremia                     | 3                  | Hospitalization                 | None                            | No                      |
| ART001     | 24.1                                                               | Poor oral intake related to mouth sores   | 3                  | Hospitalization                 | None                            | No                      |
| ART009     | 5.9                                                                | Rash: suspected systemic staph infection  | 3                  | Hospitalization                 | None                            | No                      |
| ART011     | -0.5                                                               | Ischemic middle cerebral artery stroke    | 1                  | Significant medical event       | None                            | Yes                     |
| ART010     | 10.6                                                               | Infection: cytomegalovirus encephalitis   | 3                  | Hospitalization                 | None                            | No                      |
| ART010     | 14.2 (1 <sup>st</sup> GT) <sup>6</sup><br>2.0 (2 <sup>nd</sup> GT) | Fever/infection                           | 3                  | Hospitalization                 | None                            | No                      |
| ART012     | 2.3                                                                | GI other: acute onset of blood per rectum | 3                  | Other medically important event | None                            | No                      |
| ART011     | 7.3                                                                | Infection: Urinary tract                  | 3                  | Hospitalization                 | None                            | No                      |
| ART008     | 23.8                                                               | Suspected thrombus                        | 3                  | Hospitalization                 | None                            | No                      |

<sup>1</sup> SAE = serious adverse event.

<sup>2</sup> AIHA = autoimmune hemolytic anemia.

<sup>3</sup> Grade 1 = Mild, asymptomatic or mild symptoms; Grade 2 = Moderate, minimal, local or noninvasive intervention indicated; Grade 3 = Severe or medically significant but not immediately life-threatening; Grade 4 = Life-threatening consequences, urgent intervention indicated.

<sup>4</sup> Not listed in the protocol as consistent with expectations for patients undergoing standard allogeneic hematopoietic cell transplantation for SCID.

<sup>5</sup> Centrifuge tube broke and some cells lost requiring a 2<sup>nd</sup> bone marrow harvest 3 weeks later.

<sup>6</sup> GT = gene therapy infusion.

**Table S4: Adverse Events considered to be possibly, probably, or definitely related to the study treatment.**

| AE name per CTCAE v4 <sup>1</sup>          | AE/diagnosis details                                                                        | Component of study                   | Grade 1 <sup>2</sup> Patients /Events | Grade 2 <sup>2</sup> Patients /Events | Grade 3 <sup>2</sup> Patients /Events | Grade 4 <sup>2</sup> Patients /Events | Total Patients /Events |
|--------------------------------------------|---------------------------------------------------------------------------------------------|--------------------------------------|---------------------------------------|---------------------------------------|---------------------------------------|---------------------------------------|------------------------|
| Anemia                                     | Anemia                                                                                      | Harvest, busulfan                    | 0                                     | 3 / 3                                 | 3 / 3                                 | 0                                     | 6 / 6                  |
| Anorexia                                   | Decreased appetite                                                                          | Busulfan                             | 1 / 1                                 | 0                                     | 0                                     | 0                                     | 1 / 1                  |
| Fever                                      | Fever                                                                                       | Harvest                              | 2 / 2                                 | 0                                     | 0                                     | 0                                     | 2 / 2                  |
| Hemolysis                                  | Autoimmune hemolytic anemia                                                                 | Immune reconstitution (dysregulated) | 1 / 1                                 | 2 / 2                                 | 1 / 1                                 | 0                                     | 4 / 4                  |
| Hypertension                               | Hypertension                                                                                | Stem cell infusion                   | 1 / 1                                 | 0                                     | 0                                     | 0                                     | 1 / 1                  |
| Infections/infestations: other             | Suspected infection; bone marrow culture positive while blood culture negative; no symptoms | Harvest                              | 2 / 2                                 | 0                                     | 0                                     | 0                                     | 2 / 2                  |
| Irritability                               | Fussiness                                                                                   | Harvest, busulfan                    | 2 / 2                                 | 1 / 1                                 | 0                                     | 0                                     | 3 / 3                  |
| Neutrophil count decreased                 | Neutropenia                                                                                 | Busulfan                             | 0                                     | 0                                     | 0                                     | 8 / 8                                 | 8 / 8                  |
| Pain                                       | Pain, discomfort                                                                            | Harvest                              | 3 / 3                                 | 2 / 2                                 | 0                                     | 0                                     | 5 / 5                  |
| Platelet count decreased                   | Low platelets                                                                               | Busulfan                             | 0                                     | 1 / 1                                 | 2 / 2                                 | 1 / 1                                 | 4 / 4                  |
| Vomiting                                   | Vomiting                                                                                    | Busulfan                             | 1 / 1                                 | 0                                     | 0                                     | 0                                     | 1 / 1                  |
| <b>Total adverse events in 10 patients</b> |                                                                                             |                                      | <b>13</b>                             | <b>10</b>                             | <b>8</b>                              | <b>9</b>                              | <b>40</b>              |

<sup>1</sup> AE = adverse event; CTCAE v4 = Common Terminology Criteria for Adverse Events, version 4.

<sup>2</sup> Grade 1 = Mild, asymptomatic or mild symptoms; Grade 2 = Moderate, minimal, local or noninvasive intervention indicated; Grade 3 = Severe or medically significant but not immediately life-threatening; Grade 4 = Life-threatening consequences, urgent intervention indicated.



## Supplementary References

1. Zvyagin I, Mamedov I, Tatarinova O, et al. Tracking T-cell immune reconstitution after TCRab/CD19-depleted hematopoietic cells transplantation in children. *Leukemia* 2017; 31:1145-53.
2. Delmonte OM, Castagnoli R, Yu J, et al. Poor T-cell receptor  $\beta$  repertoire diversity early posttransplant for severe combined immunodeficiency predicts failure of immune reconstitution. *J Allergy Clin Immunol* 2022;149: 1113-1119.
3. Yu Y, Ceredig R, Seoighe C. LymAnalyzer: a tool for comprehensive analysis of next generation sequencing data of T cell receptors and immunoglobulins. *Nucleic Acids Res.* 2016;44:e31.
4. Zhang W, Muck-Hausl M, Wang J, et al. Integration profile and safety of an adenovirus hybrid-vector utilizing hyperactive sleeping beauty transposase for somatic integration. *PLoS One.* 2013;8:e75344. Erratum in: *PLoS One.* 2014;9:e108836. Erratum in: *PLoS One.* 2020;15:e0228902.
5. Biffi A, Bartholomae CC, Cesana D, et al. Lentiviral vector common integration sites in preclinical models and a clinical trial reflect a benign integration bias and not oncogenic selection. *Blood* 2011;117:5332-5339.
6. Langmead B, Salzberg SL. Fast gapped-read alignment with Bowtie 2. *Nat Methods.* 2012;9:357-9.
7. Li H, Handsaker B, Wysoker A, et al. 1000 Genome Project Data Processing Subgroup. The Sequence Alignment/Map format and SAMtools. *Bioinformatics.* 2009;25:2078-9.
8. Quinlan AR, Hall IM. BEDTools: a flexible suite of utilities for comparing genomic features. *Bioinformatics.* 2010;26:841-2.
9. Frankish A, Diekhans M, Jungreis I, et al. GENCODE 2021. *Nucleic Acids Research* 2021; 49:D916–D923.
10. Basharin GP. On a statistical estimate for the entropy of a sequence of independent random variables. *Theory Probab Appl* 1959;4:333-336.
11. Jones JF, Ritenbaugh CK, Spence MA, Hayward A. Severe combined immunodeficiency among the Navajo. Characterization of phenotypes, epidemiology, and population genetics. *Hum Biol.* 1991; 63:669-82.
12. O'Marcaigh AS, DeSantes K, Hu D et al. Bone marrow transplantation for T-B- severe combined immunodeficiency disease in Athabascan-speaking native Americans. *Bone Marrow Transplant.* 2001; 27:703-9.
13. Kwan A, Abraham RS, Currier R et al. Newborn screening for severe combined immunodeficiency in 11 screening programs in the United States. *JAMA* 2014; 312:729-38
14. Kwan A, Hu D, Gomes H et al. Successful newborn screening for SCID in the Navajo Nation. *Clin Immunol.* 2015; 158:29-34.
